# Supplementary material
Source: PubMed Central journal article supplement (PMC3147918)
Supplement: supp_85_15_7742__1.pdf [file supp_85_15_7742__1.pdf]

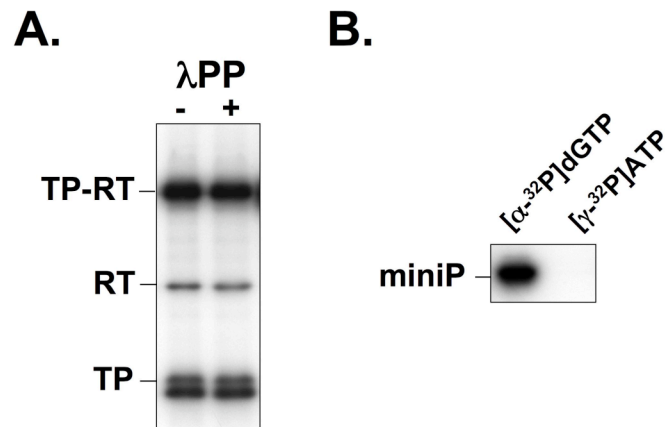

**Supplementary FIG. S2. RT labeling is not due to phosphorylation. (A) The RT modification product is resistant to phosphatase treatment.** MiniP<sub>TEV</sub> was primed using wt D $\epsilon$  RNA and  $[\alpha\text{-}^{32}\text{P}]\text{dGTP}$ , then treated with 200 U lambda protein phosphatase ( $\lambda$ PP) at 30°C for 1 h as suggested by the supplier (NEB); Mn<sup>2+</sup> essential as cofactor for  $\lambda$ PP was provided by the priming buffer. Subsequently, EDTA was added to 3 mM final concentration. After TEV protease cleavage, the samples were analyzed by SDS-PAGE and autoradiography. Note that both the TP signal (as expected) and the RT signal remained unaffected. **(B) No detectable  $\gamma$ -phosphoryl transfer from ATP to miniP<sub>TEV</sub> under priming conditions.** MiniP<sub>TEV</sub> was primed as in (A), or  $[\alpha\text{-}^{32}\text{P}]\text{dGTP}$  was replaced by  $[\gamma\text{-}^{32}\text{P}]\text{ATP}$ .

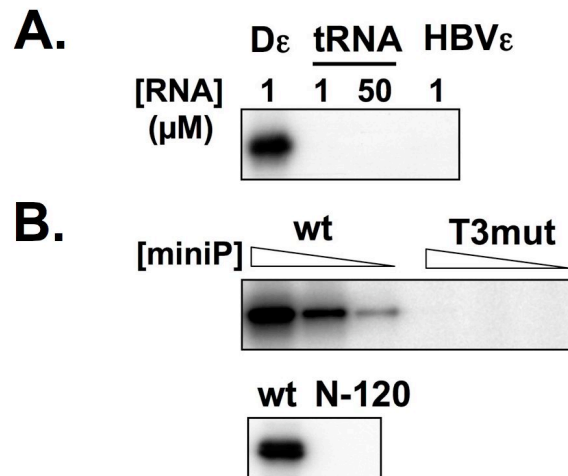

**Supplementary FIG. S3. RT modification is dependent on the cognate D $\epsilon$  RNA and on RNA binding competence of TP. (A) D $\epsilon$  dependence.** Priming assays were performed with miniP<sub>TEV</sub> in the presence of the indicated RNAs plus [ $\alpha$ -<sup>32</sup>P]dGTP and analyzed as in Supplementary FIG. S2. Note that only D $\epsilon$  RNA supported <sup>32</sup>P labeling of the protein. **(B) Dependence on RNA binding ability of TP.** Priming assays were performed with D $\epsilon$  RNA plus [ $\alpha$ -<sup>32</sup>P]dGTP using either wt miniP<sub>TEV</sub> or its non-RNA-binding variants T3mut or N-120 (see Table 1). Note that exclusively wt miniP<sub>TEV</sub> supported <sup>32</sup>P labeling. Wt miniP<sub>TEV</sub> and T3mut were tested using a three-fold dilution series.

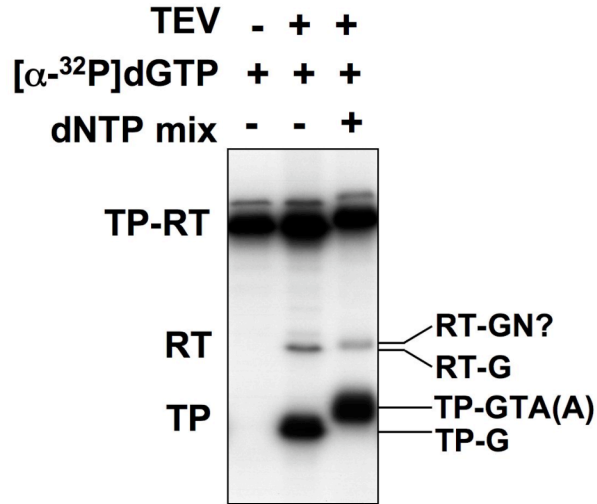

**Supplementary FIG. S4. Evidence for limited extension of the RT deoxynucleotidylated product.** MiniP<sub>TEV</sub> was primed using D $\epsilon$  RNA plus [ $\alpha$ - $^{32}$ P]dGTP, with or without a mix of unlabeled dNTPs (dATP, dCTP, dTTP; 10  $\mu$ M each). Samples were digested with TEV protease as indicated and analyzed as in Supplementary FIG. S2. The additional dNTPs caused a significant shift of the labeled TP band compared to the dGTP only reaction (TP-G), as expected for synthesis of the 3 or 4 nt GTA(A) primer (TP-GTA(A)). A less pronounced yet reproducible upward shift was also seen for the RT band (RT-GN), suggesting either a less efficient extension of the RT-bound dGMP, or a smaller effect of the extended primer on electrophoretic mobility of the RT than the TP product.

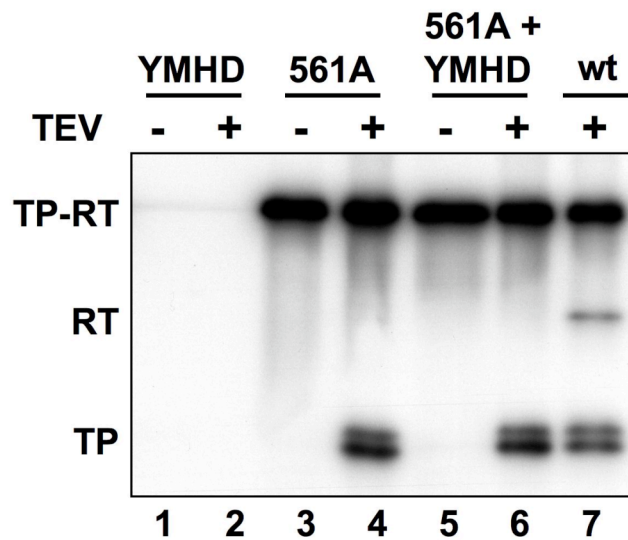

**Supplementary FIG. S5. RT nucleotidylation requires miniP DNA polymerase activity *in cis*.** Priming assays using D $\epsilon$  RNA plus [ $\alpha$ -<sup>32</sup>P]dGTP were performed with the catalytically inactive miniP<sub>TEV</sub> variant YMHD and the RT dNMP acceptor deficient variant 561A, either separately, or in combination (561A+YMHD); wt miniP<sub>TEV</sub> served as control (wt). Samples were digested with TEV protease as indicated and analyzed as in Supplementary FIG. S2. Note the complete absence of a labeled RT band in the 561A+YMHD reaction, hence Tyr561 in the YMHD variant could not serve as a *trans*-substrate. This strongly suggests that in wt miniP<sub>TEV</sub> dNMP transfer to Tyr561 occurs by an intra-molecular mechanism.

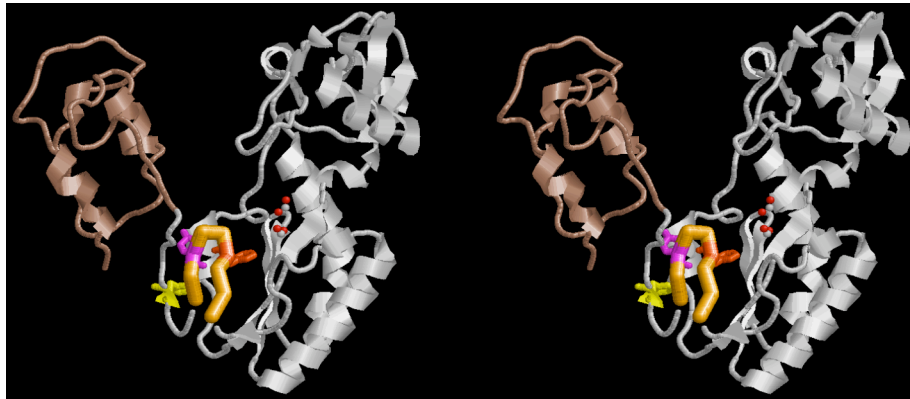

**Supplementary FIG. S6. Stereo view of the modeled RT domain of DHBV P protein.**  
The labeling is exactly as in FIG. 10C, except the view is rotated by 90° around the x-axis.
